# Supplementary material for: Core–shell PEDOT:PSS/SA composite fibers fabricated via a single-nozzle technique enable wearable sensor applications
Source: Royal Society of Chemistry journal article supplement (doi:10.1039/c9tc05527d), 2020-01-01
Supplement: c9tc05527d1.pdf [file c9tc05527d1.pdf]

## Supporting Information

### **Core-shell PEDOT: PSS/SA composite fibers *via* a single-nozzle technique enables wearable sensor applications**

*Mingxu Wang,<sup>ab</sup> Qiang Gao, \*<sup>ab</sup> Jiefeng Gao<sup>b</sup>, Chunhong Zhu<sup>c</sup>, Kunlin Chen \*<sup>b</sup>*

*<sup>a</sup>School of Chemistry and Chemical Engineering, Yangzhou University, Yangzhou 225002, China*

*<sup>b</sup>Key Laboratory of Eco-Textiles, Ministry of Education, Jiangnan University, Wuxi 214122, China*

*<sup>c</sup>Faculty of Textile Science and Technology, 3-15-1, Tokida, Ueda, Nagano, 386-8567 Japan*

**Corresponding author:** Dr. Qiang Gao(gaoqiang@yzu.edu.cn)

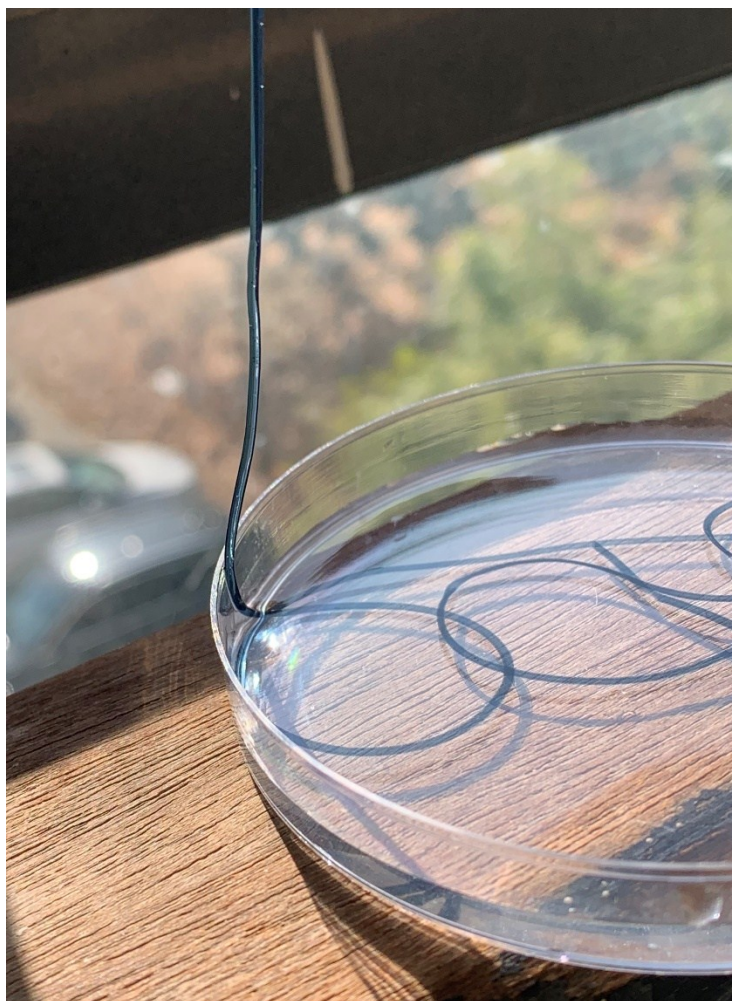

**Fig. S1** Digital photo of as-spun PEDOT: PSS/SA composite ( $x=1:3$ ) fibers *via* wet-spinning.

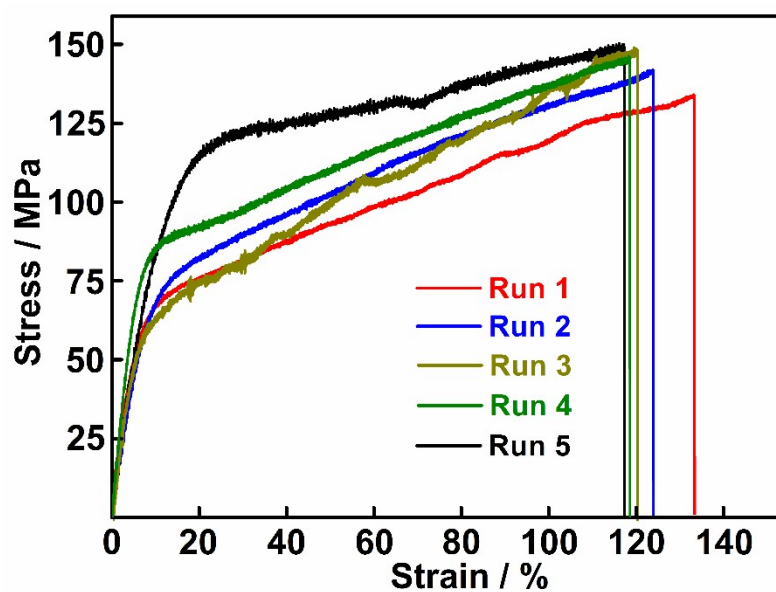

**Fig. S2** Strain-stress curves of PEDOT: PSS/SA composite ( $x=1:3$ ) fibers for different repeated drying-swelling process.

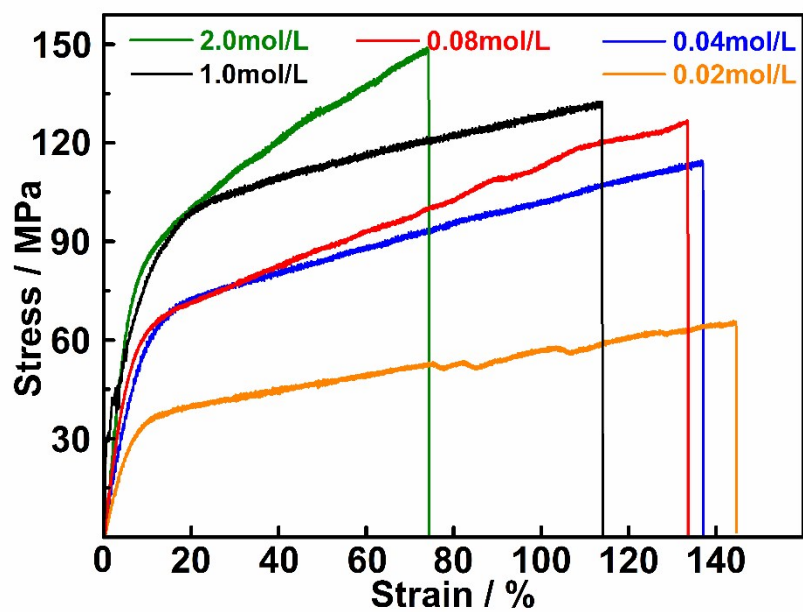

**Fig. S3** Strain-stress curves of PEDOT: PSS/SA composite fibers (x=1:3) with different  $\text{Ca}^{2+}$  concentrations in coagulation bath.

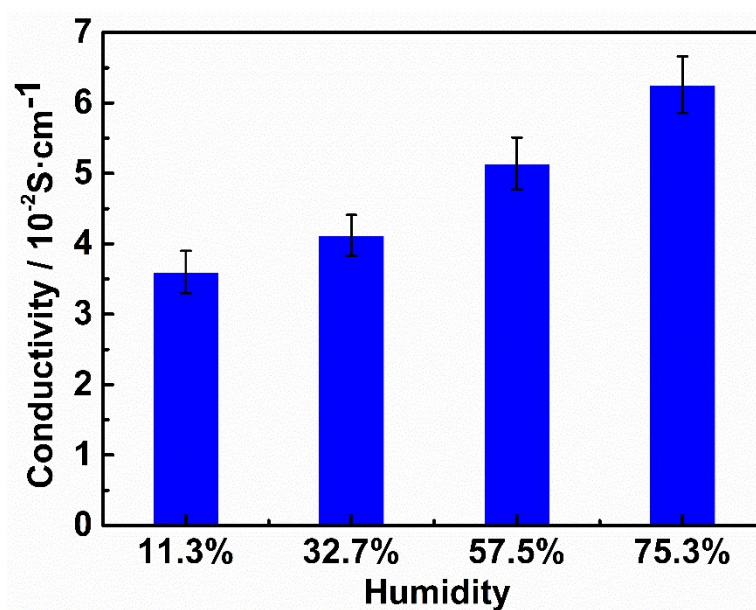

**Fig. S4** Electroconductivity of the PEDOT: PSS/SA composite fibers (x=1:3) under different humidity.
